# Supplementary material for: GABA, glutamine, glutamate oxidation and succinic semialdehyde dehydrogenase expression in human gliomas
Source: Springer Nature journal article supplement (doi:10.1186/s13046-018-0946-5), 2018-11-07

Figure S3

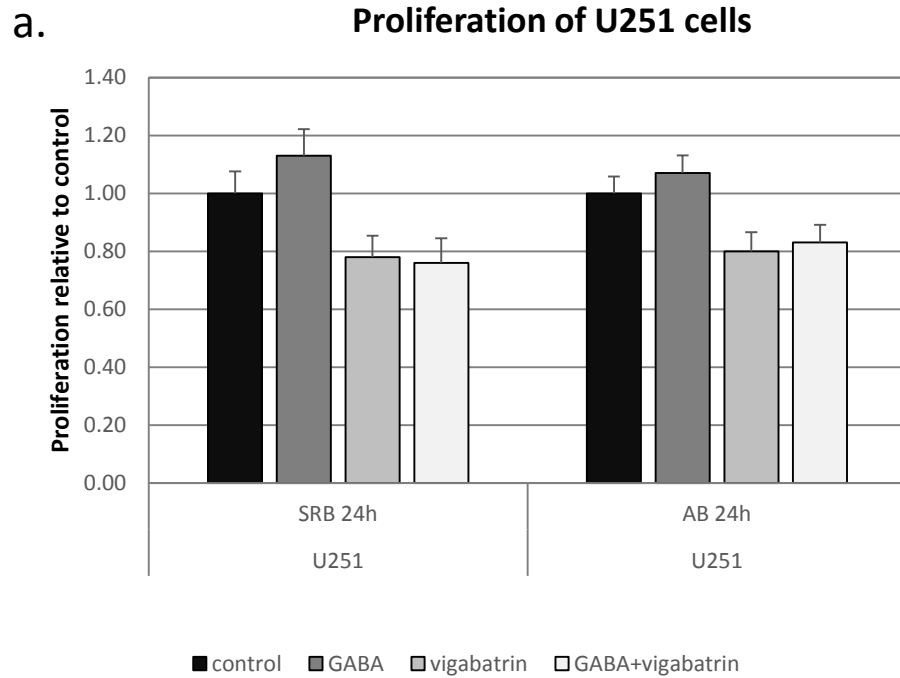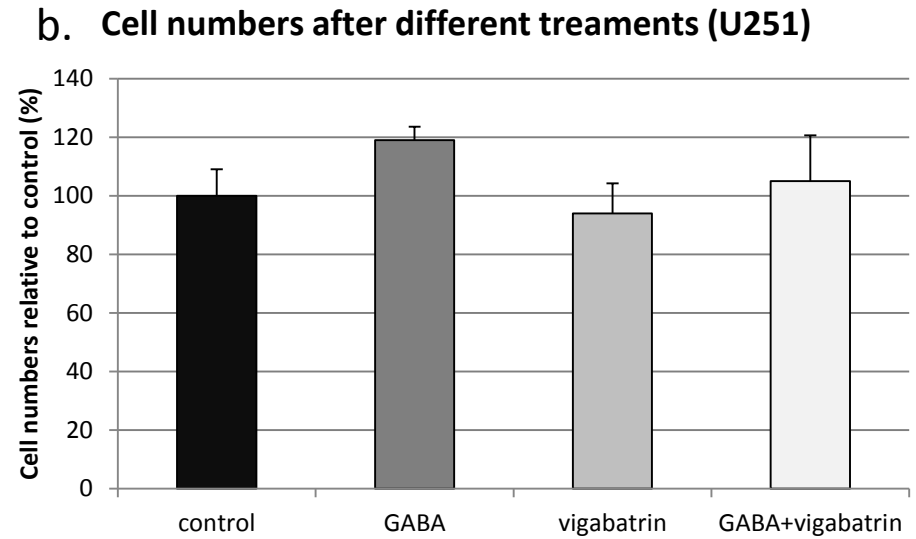

Supplement: MOESM3 [file 16257292]
